# Supplementary material for: Galanin inhibits GLP‐1 and GIP secretion via the GAL1 receptor in enteroendocrine L and K cells
Source: PubMed Central journal article supplement (PMC4761093; doi:10.1111/bph.13407), 2016-02-08
Supplement: BPH-173-888-s001.pdf [file BPH-173-888-s001.pdf]

**Supplementary Table 1:** Oligonucleotides used to create and verify GLU-Epac2camps mice

| Name     | Sequence                                                                                                           |
|----------|--------------------------------------------------------------------------------------------------------------------|
| Epac_in1 | GGG GGA AGA AGG TAC CTC CTG                                                                                        |
| Epac_in2 | CAC GGA TCC TTT CAG AAT GAT G                                                                                      |
| Epac_in3 | TCT AGA CTC AAC GTC CCT CAG                                                                                        |
| mGLP002  | TAC ATC CCA AGT GAC TGG CAC GAG ATG TTG TGA AGA TGG TTG<br>TGA ATG GTG AAA TAC CTA CTT GTA CAG CTC GTC CAT GCC GAG |
| mGLP005  | CAT CTG CAT GCA AAG CAA TAT AGC                                                                                    |
| mGLP006  | TGC TCC CCC ATC ACC CCC TAC CCA CCC CCA TTC TGT GTT CCA TCA<br>GGC AGA AAA AAA ATC CAC CAT GGT GAG CAA GGG CGA G   |
| mGLP007  | TGC TCC CCC ATC ACC CCC                                                                                            |
| mGLP008  | TAC ATC CCA AGT GAC TGG CAC                                                                                        |
| mGLU008  | AAT TGA GCT CAT TTG GAC TGC C                                                                                      |
| mGLP009  | ATA AAG CTT GCT CCC CCA TCA CC                                                                                     |
| mGLP010  | ATA CTC GAG TAC ATC CCA AGT GAC TGG                                                                                |
| mGLP011  | ATA CTC GAG TCT AAT GCT GCC TGA TG                                                                                 |
| mGLP012  | TGA ATT TAA CAT GGC ATT GGA GC                                                                                     |
| mGLP013  | ATC CAG GTG TTG TGA CTG CG                                                                                         |
| FRGLU008 | AAT TGA GCT CAT TTG GAC TGC C                                                                                      |
| RM41     | AAG GTA GAG TGA TGA AAG TTG TT                                                                                     |
| RM42     | CAC CAT GTC CTC TGT CTA TTC                                                                                        |

**Supplementary Table 2:** Immunohistochemical characterization of GLU-Epac2camps mice (small intestine, n=3 mice per strain; colon, n=2 mice per strain)

| Glu-Epac Mice strain                         | Strain 20<br>Small<br>intestine | Strain 21<br>Small<br>intestine | Strain 20<br>Colon | Strain 21<br>Colon |
|----------------------------------------------|---------------------------------|---------------------------------|--------------------|--------------------|
| Number of GFP+ve cells investigated          | 250                             | 585                             | 184                | 195                |
| Number of GFP+ve cells that were glucagon+ve | 233                             | 481                             | 177                | 186                |
| <b>% GFP+ve cells that were glucagon+ve</b>  | <b>93.2%</b>                    | <b>82.2%</b>                    | <b>96.2%</b>       | <b>95.4%</b>       |
| Number of glucagon+ve cells Investigated     | 311                             | 556                             | 205                | 213                |
| Number of glucagon+ve cells that were GFP+ve | 233                             | 481                             | 177                | 186                |
| <b>% glucagon+ve cells that were GFP+ve</b>  | <b>74.9%</b>                    | <b>86.5%</b>                    | <b>86.3%</b>       | <b>87.3%</b>       |

## Immunohistochemistry and Immunofluorescence Microscopy

Tissues from GLU-Epac2camps mice, strains 20 and 21, were fixed in 4% paraformaldehyde, dehydrated in 15% and 30% sucrose and frozen in optimal cutting temperature embedding media (VWR, Lutterworth, UK). Cryostat-cut sections (7-10  $\mu\text{m}$ ) were mounted directly onto polylysine-covered glass slides (VWR, Leuven, Belgium). Slides were incubated for 1 hour in blocking solution containing 5% donkey serum/1% BSA and overnight in PBS/0.05% Triton-X/1% BSA/5% serum with primary antisera of interest: GFP/YFP (ab5450, abcam, Cambridge, UK, 1:1000) and glucagon (Sc-13091, Santa Cruz Biotechnology, Dallas, Texas, USA, 1:200). Sections were washed with blocking solution and incubated with appropriate secondary antisera (donkey AlexaFluors 488 and 546, Life Technologies, Paisley, UK) diluted 1:300. Control sections were stained with secondary antisera alone. Sections were washed with PBS and mounted with Prolong Gold (Life Technologies, Loughborough, UK) before confocal microscopy (Leica TCS SP8 X, Wetzlar, Germany).

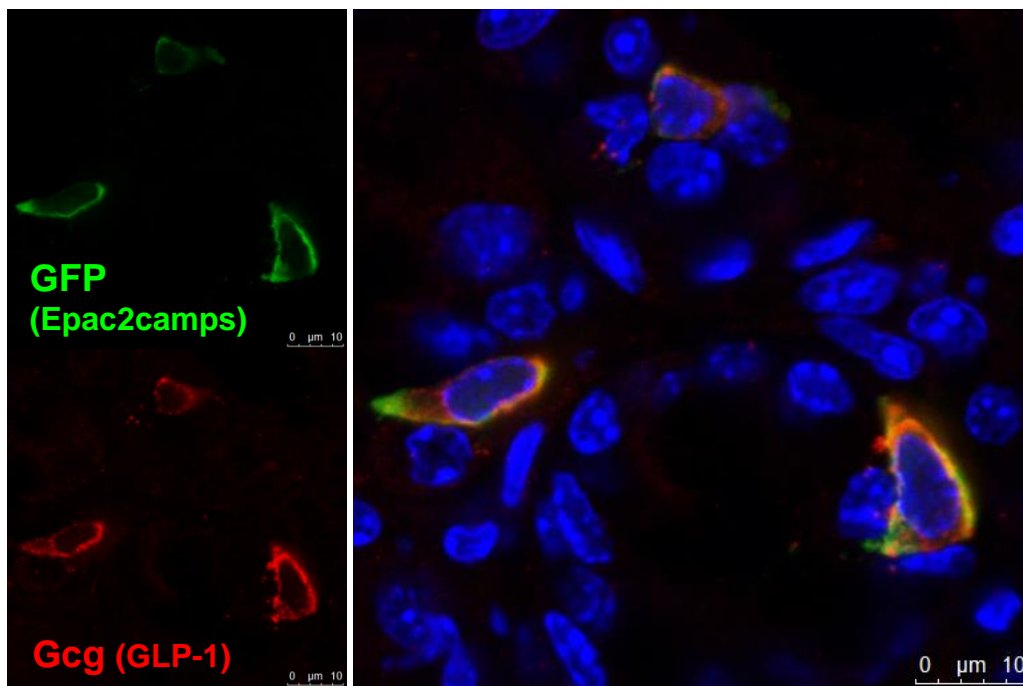

**Supplementary Figure 1.** Epac2camps in colonic L cells from a Glu-Epac2camps mouse. Fixed colonic slices were co-immunostained for GFP (representing Epac2camps) together with glucagon (Gcg, GLP-1). Nuclei were visualised with Hoechst staining.

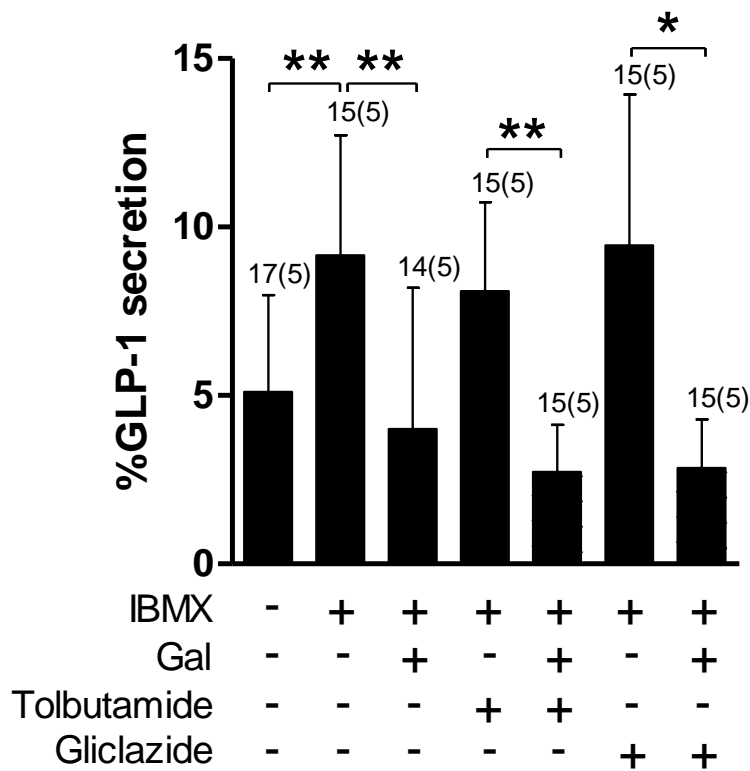

**Supplementary Figure 2.** Inhibition of IBMX-stimulated GLP-1 secretion by galanin is not affected by  $K_{ATP}$  ( $K_{ir6}$ ) channel inhibition. GLP-1 secretion was measured from primary duodenal cultures treated with IBMX (100 $\mu$ M) and Gal (100nM) in the presence or absence of the  $K_{ATP}$  channel blockers Tolbutamide (100 $\mu$ M) and Gliclazide (100nM), in the absence of glucose. Data represent mean % hormone secretion  $\pm$  SD. The number of wells that contributed to the column mean is displayed above each column; the number of independent cultures/experiments/mice is found in brackets. Statistical significance was assessed by linear regression using cluster-robust standard error estimation. \* $P < 0.05$ , \*\* $P < 0.01$
